# Supplementary material
Source: PubMed Central journal article supplement (PMC4249168)
Supplement: AEM.02365-14_zam999105809so1.pdf [file AEM.02365-14_zam999105809so1.pdf]

1 **SUPPLEMENTAL MATERIAL. TABLE S1.** PCR primers used in this study to detect VF-  
 2 encoding genes

| Pathovar                                 | Gene         | Primers (5' to 3')                                     | pb <sup>a</sup> | Reference |
|------------------------------------------|--------------|--------------------------------------------------------|-----------------|-----------|
| First set of screened VF-encoding genes  |              |                                                        |                 |           |
| STEC<br>(EHEC)                           | <i>stx1</i>  | GACTGCAAAGACGTATGTAGATTCG<br>ATCTATCCCTCTGACATCAACTGC  | 150             | (1)       |
|                                          | <i>stx2</i>  | ATCCTATTCCCGGGAGTTTACG<br>GCGTCATCGTATACACAGGAGC       | 584             | (2)       |
| EHEC<br>EPEC                             | <i>eae</i>   | GAACGGCAGAGGTTAATCTG<br>CAATGAAGACGTTATAGCCC           | 203             | (3)       |
| EPEC                                     | <i>bfpA</i>  | AATGGTGCTTGCGCTTGCTGC<br>GCCGCTTTATCCAACCTGGTA         | 330             | (4)       |
| ETEC                                     | LT           | GGCGACAGATTATACCGTGC<br>GCGAGAGGAACACAAACCGG           | 581             | (5)       |
|                                          | STa          | TCCGTCAAACAACATGACGG<br>ATAACATCCAGCACAGGCAG           | 244             | (6)       |
|                                          | STb          | GCCTATGCATCTACACAATC<br>TGAGAAATGGACAATGTCCG           | 279             | (6)       |
| ETEC<br>EAEC                             | <i>astA</i>  | GCCATCAACACAGTATATCC<br>GAGTGACGGCTTTGTAGTCC           | 106             | (7)       |
| NTEC                                     | <i>cnf</i>   | TTATATAGTCGTCAAGATGGA<br>CACTAAGCTTTACAATATTGA         | 760             | (8)       |
| Second set of screened VF-encoding genes |              |                                                        |                 |           |
| Various<br>pathovars                     | <i>ehxA</i>  | GCATCATCAAGCGTACGTTCC<br>AATGAGCCAAGCTGGTTAAGCT        | 534             | (9)       |
|                                          | <i>subAB</i> | GCAGATAAATACCCTTCACTTG<br>ATCACCAGTCCACTCAGCC          | 232             | (10)      |
|                                          | <i>papC</i>  | GCAACAGCAACGCTGGTTGCATCAT<br>AGAGAGAGCCACTCTTATACGGACA | 328             | (11)      |
|                                          | <i>cdtB</i>  | GCCGCCACCTTGCCTTAC<br>GCGCATCCGCCACTACTGAAA            | 321             | (12)      |
|                                          | <i>espP</i>  | AAACAGCAGGCACTTGAACG<br>GGAGTCGTCAGTCAGTAGAT           | 1832            | (13)      |
|                                          | <i>toxB</i>  | ATACCTACCTGCTCTGGATTGA<br>TTCTTACCTGATCTGATGCAGC       | 302             | (14)      |
|                                          | <i>katP</i>  | TTTAAAACGCTGGGATTTGC<br>CTCCTGAGAGGCGTCAGTTC           | 1174            | (15)      |
| EAEC                                     | <i>aggR</i>  | GTATACACAAAAGAAGGAAGC<br>ACAGAATCGTCAGCATCAGC          | 254             | (7)       |

3 <sup>a</sup> amplicon size

**SUPPLEMENTAL MATERIAL. TABLE S2: VFs and CTX-M genes of 133 *E. coli* strains positive for at least *stx1*, *stx2*, *eae*, *astA*, *STa* or *cnf* genes**

| Adhesin           | Phylogroup | Serotype       | VFs genes   |           |            |             |             |            |             |             |              |            |             | ESBL        |                    |             | N° of isolates | F <sup>c</sup> |  |
|-------------------|------------|----------------|-------------|-----------|------------|-------------|-------------|------------|-------------|-------------|--------------|------------|-------------|-------------|--------------------|-------------|----------------|----------------|--|
|                   |            |                | <i>papC</i> | <i>αH</i> | Toxins     |             |             |            |             |             | Intimin      | p-O157     |             |             | CTX-M <sup>a</sup> |             |                |                |  |
|                   |            |                |             |           | <i>cnf</i> | <i>stx1</i> | <i>stx2</i> | <i>STa</i> | <i>astA</i> | <i>cdtB</i> | <i>subAB</i> | <i>eae</i> | <i>espP</i> | <i>toxB</i> |                    | <i>katP</i> |                |                |  |
| None <sup>b</sup> | B1         | <b>O26:H11</b> | -           | -         | -          | -           | -           | -          | -           | -           | -            | -          | eae β       | -           | -                  | -           | no             | 1              |  |
| None              | B1         | neg            | -           | +         | -          | -           | -           | -          | -           | -           | -            | -          | eae β       | -           | +                  | +           | no             | 1              |  |
| None              | B1         | neg            | -           | -         | +          | -           | -           | -          | -           | -           | +            | -          | eae θ       | +           | -                  | +           | CTX-M-1        | 1              |  |
| None              | B1         | <b>O26:H11</b> | -           | +         | -          | stx1 a      | -           | -          | -           | -           | -            | -          | eae β       | +           | +                  | +           | no             | 1              |  |
| None              | B1         | neg            | -           | +         | -          | stx1 a      | -           | -          | -           | -           | -            | -          | eae θ       | -           | -                  | -           | no             | 1              |  |
| None              | B1         | neg            | -           | +         | -          | stx1 a      | stx2d       | -          | -           | -           | -            | -          | eae β       | +           | +                  | +           | no             | 1              |  |
| None              | B1         | <b>O26:H11</b> | -           | +         | -          | stx1 a      | stx2a       | -          | -           | -           | -            | -          | eae β       | -           | -                  | +           | no             | 1              |  |
| None              | B1         | neg            | -           | +         | -          | -           | stx2a       | -          | -           | +           | +            | -          | -           | +           | -                  | -           | no             | 1              |  |
| None              | B2         | neg            | +           | -         | +          | -           | stx2b       | -          | -           | -           | -            | -          | -           | -           | -                  | -           | no             | 1              |  |
| None              | A          | ND             | -           | -         | -          | -           | -           | +          | -           | -           | -            | -          | +           | +           | -                  | no          | 1              |                |  |
| None              | A          | ND             | -           | -         | +          | -           | -           | +          | -           | -           | -            | -          | -           | -           | -                  | no          | 1              |                |  |
| None              | A          | neg            | -           | +         | -          | -           | -           | -          | -           | -           | -            | eae ND     | -           | -           | -                  | no          | 1              |                |  |
| None              | C          | ND             | -           | -         | -          | -           | -           | -          | +           | -           | -            | -          | -           | -           | +                  | no          | 1              |                |  |
| None              | E          | ND             | -           | -         | -          | -           | -           | -          | +           | -           | -            | -          | -           | -           | -                  | no          | 1              |                |  |
| None              | C=2, E=1   | ND             | -           | -         | -          | -           | -           | -          | +           | -           | -            | -          | -           | -           | -                  | no          | 3              |                |  |
| None              | B1         | ND             | -           | -         | -          | -           | -           | -          | +           | +           | -            | -          | -           | -           | +                  | no          | 1              |                |  |
| None              | B1=3       | ND             | -           | -         | -          | -           | -           | -          | +           | -           | -            | -          | -           | -           | +                  | no          | 3              |                |  |
| None              | B1         | ND             | -           | -         | -          | -           | -           | -          | +           | -           | -            | -          | -           | -           | +                  | no          | 1              |                |  |
| None              | D          | ND             | -           | -         | -          | -           | -           | -          | +           | -           | -            | -          | -           | -           | -                  | no          | 1              |                |  |
| None              | C=2        | ND             | -           | -         | +          | -           | -           | -          | -           | -           | -            | -          | -           | -           | -                  | no          | 2              |                |  |
| None              | B1         | ND             | -           | -         | +          | -           | -           | -          | -           | -           | -            | -          | -           | -           | +                  | no          | 1              |                |  |
| None              | D          | ND             | -           | -         | +          | -           | -           | -          | -           | -           | -            | -          | -           | -           | -                  | CTX-M-9     | 1              | 48,2           |  |

|          |      |    |   |   |   |   |   |   |   |   |   |   |   |   |         |         |    |       |
|----------|------|----|---|---|---|---|---|---|---|---|---|---|---|---|---------|---------|----|-------|
| F5 + F41 | A    | ND | - | - | - | - | - | + | - | - | - | - | + | - | -       | no      | 14 |       |
| F5 + F41 | A    | ND | - | - | - | - | - | + | - | - | - | - | - | - | -       | no      | 1  |       |
| F5 + F41 | A    | ND | - | - | + | - | - | + | - | - | - | - | + | - | -       | no      | 1  |       |
| F5 + F41 | A    | ND | + | - | - | - | - | + | - | - | - | - | - | - | -       | no      | 1  |       |
| F5 + F41 | A    | ND | - | - | - | - | - | + | - | - | - | - | - | - | +       | no      | 2  |       |
| F5 + F41 | A    | ND | - | - | - | - | - | + | + | - | - | - | - | - | +       | CTX-M-9 | 1  |       |
| F5 + F41 | A    | ND | - | - | - | - | - | + | - | - | - | - | + | - | +       | CTX-M-1 | 1  |       |
| F5 + F41 | A    | ND | - | - | - | - | - | + | + | - | - | - | - | - | -       | no      | 1  |       |
| F5 + F41 | B1   | ND | - | - | - | - | - | + | - | - | - | - | - | - | -       | no      | 1  |       |
| F5 + F41 | B1   | ND | - | - | - | - | - | + | + | - | - | - | - | - | -       | CTX-M-1 | 1  |       |
| F5 + F41 | C    | ND | - | - | - | - | - | + | - | - | - | - | + | - | -       | no      | 1  |       |
| F5 + F41 | B1   | ND | - | - | + | - | - | + | - | - | - | - | - | - | -       | no      | 1  | 100,0 |
| F17Ac    | A    | ND | - | - | + | - | - | - | - | - | - | - | - | - | +       | no      | 1  |       |
| F17And   | A    | ND | - | - | + | - | - | - | + | - | - | - | - | - | +       | CTX-M-9 | 1  |       |
| F17Aab   | B1   | ND | - | - | + | - | - | - | - | + | - | - | - | - | +       | no      | 1  |       |
| F17Ab    | B1   | ND | - | - | + | - | - | - | - | - | - | - | - | - | -       | no      | 1  |       |
| F17Ab    | B1=3 | ND | - | - | + | - | - | - | - | + | - | - | - | - | +       | no      | 3  |       |
| F17Abc   | B1   | ND | - | - | + | - | - | - | - | + | - | - | - | - | -       | no      | 1  |       |
| F17And   | B1   | ND | - | - | + | - | - | - | - | + | - | - | - | - | +       | no      | 1  |       |
| F17Aab   | B2   | ND | - | - | + | - | - | - | - | - | - | - | - | - | -       | no      | 1  |       |
| F17Aac   | C    | ND | - | - | + | - | - | - | - | - | - | - | + | - | -       | no      | 1  |       |
| F17Ab    | C    | ND | - | - | + | - | - | - | - | + | - | - | - | - | -       | no      | 1  |       |
| F17Ac    | C    | ND | - | - | + | - | - | - | - | - | - | - | - | + | no      | 1       |    |       |
| F17Ac    | C    | ND | - | - | + | - | - | - | - | - | - | - | - | + | CTX-M-1 | 1       |    |       |
| F17Aab   | D    | ND | - | - | + | - | - | - | - | + | - | - | - | - | -       | no      | 1  |       |
| F17Aa    | F    | ND | - | - | + | - | - | - | + | + | - | - | - | - | -       | no      | 1  |       |
| F17Aa    | C    | ND | - | - | + | - | - | - | + | - | - | - | - | - | -       | no      | 1  |       |
| F17Aa    | A    | ND | - | - | - | - | - | - | + | - | - | - | - | - | +       | no      | 1  |       |
| F17Aa    | D    | ND | - | - | - | - | - | - | + | - | - | - | - | - | -       | no      | 1  |       |
| F17Ac    | F    | ND | - | - | - | - | - | - | + | - | - | - | - | - | -       | no      | 1  |       |
| F17And   | B2   | ND | + | - | - | - | - | - | + | - | - | - | - | - | +       | no      | 1  |       |
| F17Aa    | A    | ND | - | - | - | - | - | - | + | - | - | - | - | - | -       | no      | 1  | 29,7  |

|       |                                               |     |   |   |   |       |       |   |   |   |   |   |       |   |   |                                       |    |      |
|-------|-----------------------------------------------|-----|---|---|---|-------|-------|---|---|---|---|---|-------|---|---|---------------------------------------|----|------|
| CS31A | B1=1,<br>B2=1, C=6,<br>D=14, E=2,<br>F=4 ND=2 | ND  | - | - | - | -     | -     | - | + | - | - | - | -     | - | - | no                                    | 30 |      |
| CS31A | C=1, D=2,<br>ND=1                             | ND  | - | - | - | -     | -     | - | + | - | - | - | -     | - | - | no                                    | 4  |      |
| CS31A | A=1, C=2,<br>D=1                              | ND  | + | - | - | -     | -     | - | + | - | - | - | -     | - | - | no                                    | 4  |      |
| CS31A | C                                             | ND  | + | - | - | -     | -     | - | + | - | - | - | +     | - | + | CTX-M-1                               | 1  |      |
| CS31A | C                                             | ND  | + | - | - | -     | -     | - | + | - | - | - | +     | - | - | no                                    | 1  |      |
| CS31A | D                                             | ND  | + | + | - | -     | -     | - | + | - | - | - | -     | - | - | no                                    | 1  |      |
| CS31A | D=1, F=1                                      | ND  | - | - | + | -     | -     | - | + | - | - | - | -     | - | - | no                                    | 2  |      |
| CS31A | C                                             | ND  | - | - | - | -     | -     | - | + | - | - | - | -     | - | - | no                                    | 1  |      |
| CS31A | D=3, F=4,<br>ND=1                             | ND  | - | - | - | -     | -     | - | + | - | - | - | -     | - | - | CTX-M-1=1,<br>CTX-M-2=1,<br>CTX-M-9=6 | 8  |      |
| CS31A | C                                             | ND  | - | - | - | -     | -     | - | + | - | - | - | +     | - | - | CTX-M-1                               | 1  |      |
| CS31A | C                                             | ND  | - | - | - | -     | -     | - | + | - | - | - | +     | - | + | CTX-M-1                               | 1  |      |
| CS31A | C                                             | ND  | - | - | - | -     | -     | - | + | - | - | - | -     | - | - | CTX-M-9                               | 1  |      |
| CS31A | D                                             | ND  | - | - | - | -     | -     | + | + | - | - | - | +     | - | - | no                                    | 1  |      |
| CS31A | A                                             | ND  | - | - | + | -     | -     | - | - | - | - | - | -     | - | - | CTX-M-9                               | 1  |      |
| CS31A | A                                             | neg | - | + | - | stx1a | stx2a | - | - | - | - | - | eae β | + | - | no                                    | 1  | 52,3 |

5 ND, Not determined; (-) PCR negative; (+) PCR positive; H, haemolysin; F17And, untypeable F17A variant.

6 <sup>a</sup>when more than one isolate by lane was illustrated, the number of strains belonging to each phylogroup or CTX-M group was noticed.

7 <sup>b</sup>“none” group corresponding to strains which did not have any CS31A, F17, F5 or F41 adhesin tested.

8 <sup>c</sup>Frequency expressed by adhesin group

9



22 KM496467 and KM496468). Seven F17A reference nucleotide sequences (GenBank  
23 accession numbers CP001162 (12), AF022140 (19), L14318.1 (20), AFDZ01000020.1,  
24 L77091.1, AF055309 (21), L43373.1) were included in the analysis. The positions of the  
25 targeted aligned nucleotide sequences obtained by using the Clustal Omega (22) from the  
26 PCR or reference nucleotide sequences were noticed after the forward slashes.

27

28 SUPPLEMENTAL DATA REFERENCES

- 29 1. **Pollard DR, Johnson WM, Lior H, Tyler SD, Rozee KR.** 1990. Differentiation of Shiga  
30 toxin and Vero cytotoxin type 1 genes by polymerase chain reaction. *J Infect Dis* **162**:1195-  
31 1198.
- 32 2. **Cebula TA, Payne WL, Feng P.** 1995. Simultaneous identification of strains of *Escherichia*  
33 *coli* serotype O157:H7 and their Shiga-like toxin type by mismatch amplification mutation  
34 assay-multiplex PCR. *J Clin Microbiol* **33**:248-250.
- 35 3. **Clermont O, Olier M, Hoede C, Diancourt L, Brisse S, Keroudean M, Glodt J, Picard B,**  
36 **Oswald E, Denamur E.** 2011. Animal and human pathogenic *Escherichia coli* strains share  
37 common genetic backgrounds. *Infection, Genetics and Evolution* **11**:654-662.
- 38 4. **Gunzburg ST, Tornieporth NG, Riley LW.** 1995. Identification of enteropathogenic  
39 *Escherichia coli* by PCR-based detection of the bundle-forming pilus gene. *J Clin Microbiol*  
40 **33**:1375-1377.
- 41 5. **Nataro JP, Kaper JB.** 1998. Diarrheagenic *Escherichia coli*. *Clin Microbiol Rev* **11**:142-201.
- 42 6. **Ojeniyi B, Ahrens P, Meyling A.** 1994. Detection of fimbrial and toxin genes in *Escherichia*  
43 *coli* and their prevalence in piglets with diarrhoea. The application of colony hybridization  
44 assay, polymerase chain reaction and phenotypic assays. *Zentralbl Veterinarmed B* **41**:49-59.
- 45 7. **Fujioka M, Kasai K, Miura T, Sato T, Otomo Y.** 2009. Rapid diagnostic method for the  
46 detection of diarrheagenic *Escherichia coli* by multiplex PCR. *Jpn J Infect Dis* **62**:476-480.
- 47 8. **Van Bost S, Jacquemin E, Oswald E, Mainil J.** 2003. Multiplex PCRs for identification of  
48 necrotoxicogenic *Escherichia coli*. *J. Clin. Microbiol.* **41**:4480-4482.
- 49 9. **Paton AW, Paton JC.** 1998. Detection and characterization of Shiga toxigenic *Escherichia*  
50 *coli* by using multiplex PCR assays for *stx1*, *stx2*, *eaeA*, enterohemorrhagic *E. coli* *hlyA*,  
51 *rfbO111*, and *rfbO157*. *J Clin Microbiol* **36**:598-602.
- 52 10. **Slanec T, Fruth A, Creuzburg K, Schmidt H.** 2009. Molecular analysis of virulence profiles  
53 and Shiga toxin genes in food-borne Shiga toxin-producing *Escherichia coli*. *Appl Environ*  
54 *Microbiol* **75**:6187-6197.
- 55 11. **Yamamoto S, Terai A, Yuri K, Kurazono H, Takeda Y, Yoshida O.** 1995. Detection of  
56 urovirulence factors in *Escherichia coli* by multiplex polymerase chain reaction. *FEMS*  
57 *Immunol Med Microbiol* **12**:85-90.
- 58 12. **Johnson TJ, DebRoy C, Belton S, Williams ML, Lawrence M, Nolan LK, Thorsness JL.**  
59 2010. Pyrosequencing of the Vir plasmid of necrotoxicogenic *Escherichia coli*. *Vet Microbiol*  
60 **144**:100-109.
- 61 13. **Leyton DL, Sloan J, Hill RE, Doughty S, Hartland EL.** 2003. Transfer region of pO113  
62 from enterohemorrhagic *Escherichia coli*: similarity with R64 and identification of a novel  
63 plasmid-encoded autotransporter, EpeA. *Infect Immun* **71**:6307-6319.
- 64 14. **Tarr PI.** 1995. *Escherichia coli* O157:H7: clinical, diagnostic, and epidemiological aspects of  
65 human infection. *Clin Infect Dis* **20**:1-8.
- 66 15. **Gerrish RS, Lee JE, Reed J, Williams J, Farrell LD, Spiegel KM, Sheridan PP, Shields**  
67 **MS.** 2007. PCR versus hybridization for detecting virulence genes of enterohemorrhagic  
68 *Escherichia coli*. *Emerg Infect Dis* **13**:1253-1255.
- 69 16. **Gascuel O.** 1997. BIONJ: an improved version of the NJ algorithm based on a simple model  
70 of sequence data. *Molecular biology and evolution* **14**:685-695.
- 71 17. **Gouy M, Guindon S, Gascuel O.** 2010. SeaView version 4: A multiplatform graphical user  
72 interface for sequence alignment and phylogenetic tree building. *Molecular biology and*  
73 *evolution* **27**:221-224.
- 74 18. **Bertin Y, Martin C, Oswald E, Girardeau JP.** 1996. Rapid and specific detection of F17-  
75 related pilin and adhesin genes in diarrheic and septicemic *Escherichia coli* strains by  
76 multiplex PCR. *J Clin Microbiol* **34**:2921-2928.
- 77 19. **Lintermans P, Pohl P, Deboeck F, Bertels A, Schlicker C, Vandekerckhove J, Van**  
78 **Damme J, Van Montagu M, De Greve H.** 1988. Isolation and nucleotide sequence of the  
79 F17-A gene encoding the structural protein of the F17 fimbriae in bovine enterotoxigenic  
80 *Escherichia coli*. *Infect Immun* **56**:1475-1484.

- 81 20. **el Mazouari K, Oswald E, Hernalsteens JP, Lintermans P, De Greve H.** 1994. F17-like  
82 fimbriae from an invasive *Escherichia coli* strain producing cytotoxic necrotizing factor type 2  
83 toxin. *Infect Immun* **62**:2633-2638.
- 84 21. **Cid D, Sanz R, Marin I, de Greve H, Ruiz-Santa-Quiteria JA, Amils R, de la Fuente R.**  
85 1999. Characterization of nonenterotoxigenic *Escherichia coli* strains producing F17 fimbriae  
86 isolated from diarrheic lambs and goat kids. *J Clin Microbiol* **37**:1370-1375.
- 87 22. **McWilliam H, Li W, Uludag M, Squizzato S, Park YM, Buso N, Cowley AP, Lopez R.**  
88 2013. Analysis Tool Web Services from the EMBL-EBI. *Nucleic Acids Res* **41**:W597-600.
- 89
- 90
